# Supplementary material
Source: PubMed Central journal article supplement (PMC2854298)

**Supplementary Figure 1. Immunohistochemical analysis of AATF in islets.** Distribution of AATF in rat pancreata analyzed by immunohistochemistry using anti-AATF, anti-insulin, and anti-glucagon antibodies. Merged images show the co-localization of AATF and insulin (upper panel) or AATF and glucagon (lower panel).

**Supplementary Figure 2. AATF is regulated by the Perk-eIF2 $\alpha$  pathway.** (A) Reconstitution of Perk in Perk<sup>-/-</sup> mouse embryonic fibroblasts recovered AATF gene expression. Perk<sup>-/-</sup> mouse embryonic fibroblasts were transfected with pcDNA3/Perk and then treated with or without thapsigargin (Tg, 1  $\mu$ M) for 8 hr. Expression levels of Aatf, Chop, and Perk mRNA were measured by real-time PCR (n = 3; values are mean  $\pm$  SD). (B) AATF induction by thapsigargin treatment is attenuated by Perk RNAi. Neuro2a cells were transfected with control scrambled siRNA or siRNA against mouse Perk, then treated with or without 0.5  $\mu$ M of thapsigargin (Tg) for 8 hr. (C) AATF induction by thapsigargin treatment is not attenuated by ATF6 RNAi. Neuro2a cells were transfected with control scrambled siRNA or siRNA against mouse Atf6, then treated with or without 0.5  $\mu$ M of thapsigargin (Tg) for 8 hr.

**Supplementary Figure 3. Glucose deprivation induces ER stress.** Glucose deprivation causes ER stress-mediated apoptosis. INS-1 832/13 cells were cultured in glucose-free media for the indicated times. Expression levels of Chop and AATF mRNA were measured by real-time PCR (left panel) (n = 3; values are mean  $\pm$  SD). Expression levels of caspase-3 (Casp3) and actin were measured by immunoblot. Single and double asterisks indicate uncleaved and cleaved caspase-3, respectively (right panel).

**Supplementary Figure 4. AATF is localized to the nucleus and nucleolus.**

INS-1 832/13 cells were co-stained with anti-AATF and anti-Nucleolin antibodies as well as DAPI. Merged images show the co-localization of AATF and Nucleolin.

**Supplementary Figure 5. Verification of AATF target genes by real-time RT PCR.** The expression of 6 AATF targeting candidates in AATF knock-down INS1 832/13 cells with or without thapsigargin (Tg) was examined by real-time PCR (n = 3; values are mean  $\pm$  SD).

**Supplementary Figure 6. Promoter activities of Akt1 intron1 with Stat3 over-expression.** Luciferase activity in neuro2a cells transfected with the indicated intron1 region of Akt1 or control mock promoter construct, with or without Stat3 expressing vector (pFlag/STAT3-C). The ratio (Stat3 overexpression/control) of the relative promoter activities was calculated. (n = 3; values are mean  $\pm$  SD). pGL4.14/Akt1<sup>-1323/-32</sup> showed the highest induction ratio by Stat3 among the fragments of different length. The numbers on Akt1 intron1 promoter indicates the distance from the start codon.

**Supplementary Figure 7. Akt1 is the most protective molecule for ER stress-mediated apoptosis among the AATF targeting gene candidates.** (A) We designed siRNAs against each AATF target gene and transfected them in INS1 832/13 cells, then treated them with or without 0.25  $\mu$ M of thapsigargin (Tg) for 24 hr. The expression of 6 AATF targeting genes was examined by real-time PCR (n = 3; values are mean  $\pm$  SD). (B) Expression levels of caspase-3 (Casp3) and actin were measured by immunoblot. Single and double asterisks indicate uncleaved and cleaved caspase-3, respectively. The ratio between cleaved caspase-3 and actin was measured using ImageJ software.

**Supplementary Figure 8. Mouse primary islets are infected with lentiviruses overexpressing AATF and Akt1.** (A) Mouse primary islets were infected with LV-TO/GFP, a

lentivirus overexpressing GFP. Phase contrast, GFP, and merged pictures are shown. All the intact islets showed GFP signals at 48 hr after infection. (B) Mouse primary islets were infected with LV-TO/GFP (GFP), LV-TO/AATF (AATF), or LV-TO/Akt1 (Akt1). An empty lentivirus was used as a negative control (mock). Expression levels of AATF and Akt1 mRNA were measured by real-time PCR at 48 hr after infection (n = 3; values are mean ± SD). (C) Mouse primary islets were infected with LV-TO/AATF (AATF), LV-TO/Akt1 (Akt1), and empty LV-TO (mock) virus. Then, islets were treated with thapsigargin (Tg, 0.5 μM) for 6 hr. After dispersion, cells were fixed and stained with anti-cleaved caspase-3 and anti-insulin antibodies. The ratio of cells with cleaved-caspase-3 signals to those with Insulin signals was calculated as shown in Figure 7F.

**Supplementary Figure 9. Both WFS1 and AATF are upstream regulators of Akt1 expression.** (A) INS1 832/13 cells were transfected with control scramble siRNA or siRNA against WFS1, then treated with 0.5 μM of thapsigargin (Tg) for 20 hr. Expression levels of WFS1, AATF, and Akt1 mRNA were measured by real-time PCR (n = 3; values are mean ± SD). (B) INS-1 832/13 cells were stably transduced with LV-TO/AATF, an inducible lentivirus expressing mouse AATF. Cells were cultured with or without doxycycline (0.2 μg/ml) to induce AATF for 48 hr, then challenged with thapsigargin (Tg, 0.5 μM) for 20 hr. Cells were also transfected with control scramble siRNA (Cont) or siRNA against WFS1. Expression levels of WFS1, AATF, and Akt1 mRNA were measured by real-time PCR (n = 3; values are mean ± SD). (C) INS1 832/13 cells (left panel) and neuro2a cells (right panel) were transfected with control scramble siRNA or siRNA against AATF, then treated with 0.5 μM of thapsigargin (Tg) for 16 hr. Expression levels of WFS1 mRNA were measured by real-time PCR (n = 3; values are

mean  $\pm$  SD). Expression levels of AATF, WFS1, and actin proteins were measured by immunoblot (lower panel). (D) Luciferase activity in neuro2a cells transfected with WFS1 promoter (pGL4.13/WFS1<sup>-521/+39</sup>) or control promoter constructs, plus vectors expressing spliced form of XBP1 (n = 3; values are mean  $\pm$  SD) (right panel).

**Supplementary Figure 10. Expression of Puma and Bim is not regulated by the WFS1-AATF pathway.** INS1 832/13 cells were transfected with control scramble siRNA or siRNA directed against WFS1 or AATF, then treated with 1  $\mu$ M of thapsigargin (Tg) for 8 hr. (A) Expression levels of Puma and Bim mRNA were measured by real-time PCR (n = 3; values are mean  $\pm$  SD). (B) Expression levels of Puma, Bim, WFS1, AATF, and actin proteins were measured by immunoblot.

## **Supplementary Methods**

### ***Plasmid expressing mouse Perk and transfection***

A plasmid expressing mouse Perk gene was generated by introducing mouse Perk cDNA in pcDNA3 vector. MEF cells were transfected with pcDNA3/mPerk by using the Amaxa Nucleofector Device.

### ***Small interfering RNA and primers***

siRNAs directed against mouse Perk, mouse Atf6 and rat AATF-target genes were designed and synthesized: for mouse Perk, CCATACTACAAGAGAGAAA; for mouse Atf6 AAGAAGTATCCTGCCATTTAA; for rat Noc4l, GCAGCTGGAAGGAGCGAAA; for rat Chn2, GTTTGTTGCACTTCGATAA; for rat Rfc2, AAATAGTGGGAAACGAAGA; for rat Sdc2, CGACCTTGGAGAACGCAAA; for rat Prg1, TGGAAGAGCAAGAACGAGA and for rat Hmga1, GCACAGCCAAGACGCGGAA. siRNA transfections were carried out by using the Amaxa Nucleofector Device.

The following sets of primers and Power SYBR Green PCR Master Mix were used for real-time PCR in supplementary experiments: for mouse Perk, AAGTTTCCGTTGCTGATTGG and ACGCGATGGGAGTACAAAAC; for mouse Atf6a, CCACCCTCACTGTTGGAACT and GAGTATGCTCTGGGCTGAGG; for mouse BiP, TTCAGCCAATTATCAGCAAACCTCT and TTTTCTGATGTATCCTCTTCACCAGT; for mouse WFS1, CCATCAACATGCTCCCGTTC and GGGTAGGCCTCGCCATACA; for mouse Chop, CCACCACACCTGAAAGCAGAA and AGGTGAAAGGCAGGGACTCA; for rat Noc4l, CTGTGAACCTACCCCTCCAA and GCTTTCCTCTGCTCCTTCAA; for rat Chn2, TATGAGACCCTGCGCTACCT and CCCAGATTTTCTGCGTTCAT; for rat Rfc2, CCTCAGGAGAACCATGGAAA and

GGACTGGATGGGCTCTATGA; for rat Sdc2, TGGCTTTCTCTTTGCCATTT and CAAGGTCGTAGCTTCCTTCG; for rat Prg1, GGAAAGCTCCGGAGAAGAGT and CTCTTGCGATCTCCAGAACC; for rat Hmga1, CAGGAAAAGGATGGGACTGA and TCACTGGGCTCCTTCTGACT; for rat Puma, GCGGAGACAAGAAGAGCAAC and CTCCAGGATCCCTGGGTAAG; for rat Bim, GCAGTCTCAGGAGGAACCTG and TTGAACTCGTCTCCGATCCT.

### ***Promoter assay***

In the experiments of Supplementary Figure 6, the intron1 promoter regions of mouse Akt1 gene were amplified by PCR and cloned it into the KpnI/XhoI site of the pGL4.14 vector (Promega). Fragments of mouse Akt1 intron1 region includes -1629/-32, -1323/-32, -897/-32, -630/-32, -320/-32, and -1629/-1100. Neruo2a cells were transfected with pGL4.14 vectors containing various fragments indicated in Supplementary Figure 6, Stat3 expressing vector (pFlag/STAT3-C) or pFlag empty vector, and pcDNA3/ $\beta$ -galactosidase. In the experiments of Supplementary Figure 9D, Neruo2a cells were transfected with pGL4.13/WFS1<sup>-521/+39</sup>, pFlag/spliced-XBP1 (XBP1), pCS2+/AATF (AATF), and pcDNA3/ $\beta$ -galactosidase. pGL4.13 and pFlag empty vectors were used as negative controls. pGL4.13/WFS1<sup>-521/+39</sup> was a kind gift from Dr. Kato (30). 24 hrs post-transfection, lysates were prepared using a Luciferase Assay System kit (Promega). The light produced from the samples was read by a standard plate reading luminometer.  $\beta$ -galactosidase activity was measured by  $\beta$ -Gal Reporter Gene Assay, chemiluminescent (Roche). The assay was performed independently three times.

### ***Antibodies***

Both anti-Puma and anti-Bim antibodies were purchased from Cell Signaling.

Supplementary Table 1

Genes decreased more than 2-fold in WFS1-deficient  $\beta$  cells (WFS1-RNAi/Control-RNAi).

| symbols    | ID         | Log 2 Ratio<br>(WFS1kd/Cont.) | P.Val    |
|------------|------------|-------------------------------|----------|
| Slc35a1    | 1374662_at | -1.45                         | 6.47E-05 |
| Spata6     | 1368643_at | -1.43                         | 0.000107 |
| Aatf       | 1368330_at | -1.23                         | 0.000125 |
| Pcnp       | 1389040_at | -1.17                         | 0.000125 |
| Gnb1       | 1367732_at | -1.16                         | 6.47E-05 |
| Fdx1       | 1368336_at | -1.13                         | 0.000149 |
| Fmr1       | 1393459_at | -1.11                         | 0.000396 |
| Cst6       | 1368162_at | -1.09                         | 0.000431 |
| RGD1565975 | 1381759_at | -1.07                         | 0.001921 |
| Lrp11      | 1372443_at | -1.06                         | 0.000107 |
| Gc         | 1368288_at | -1.04                         | 0.000181 |
| Acbd5      | 1373507_at | -1.01                         | 0.000273 |

Supplementary Table 2

Genes decreased more than 2-fold in AATF-deficient  $\beta$  cells (AATF-RNAi/Control-RNAi).

| symbols | ID         | Log 2 Ratio<br>(AATFkd/Cont.) | P.Val    |
|---------|------------|-------------------------------|----------|
| Aatf    | 1368330_at | -2.71                         | 0.000706 |
| Rfc2    | 1370910_at | -1.53                         | 0.000713 |
| Prg-1   | 1379374_at | -1.40                         | 0.000706 |
| Sdc2    | 1370166_at | -1.35                         | 0.006119 |
| Hmga1   | 1388309_at | -1.28                         | 0.001311 |
| Akt1    | 1383126_at | -1.18                         | 0.006119 |
| Chn2    | 1376800_at | -1.12                         | 0.001012 |
| Noc4l   | 1377760_at | -1.03                         | 0.001953 |



Supplementary Table 3

Differentially expressed genes which were commonly seen in the list of two different profiles, WFS1 knock-down and AATF knock-down microarray experiments.

| symbols       | ID         | Log 2 Ratio<br>(WFS1kd/Cont) | P.Val.WFS1 | Log 2 Ratio<br>(AATFkd/Cont) | P.Val.AATF |
|---------------|------------|------------------------------|------------|------------------------------|------------|
| Aatf          | 1368330_at | -1.23                        | 0.000125   | -2.71                        | 0.000706   |
| Wfs1          | 1368839_at | -0.79                        | 0.000241   | -0.69                        | 0.009504   |
| Tmem161b      | 1374605_at | -0.79                        | 0.001011   | 0.64                         | 0.008557   |
| Pphln1        | 1389547_at | -0.77                        | 0.000252   | -0.70                        | 0.006119   |
| Cyp4a8        | 1393894_at | -0.63                        | 0.000987   | -0.72                        | 0.006119   |
| Klf2          | 1376569_at | -0.57                        | 0.002617   | 0.64                         | 0.007011   |
| unknown locus | 1383932_at | -0.48                        | 0.003311   | -0.90                        | 0.004514   |
| Rac1          | 1388332_at | 0.43                         | 0.004823   | 0.77                         | 0.006805   |
| Vav3          | 1393605_at | 0.44                         | 0.003659   | 1.10                         | 0.001012   |

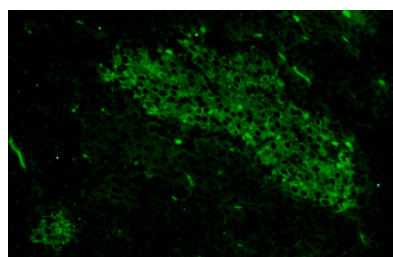

AATF

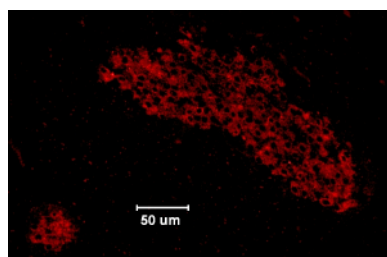

Insulin

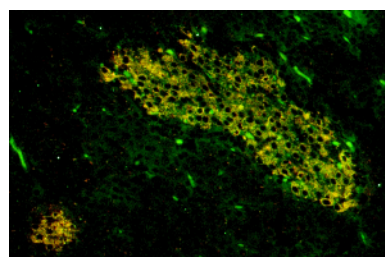

Merge

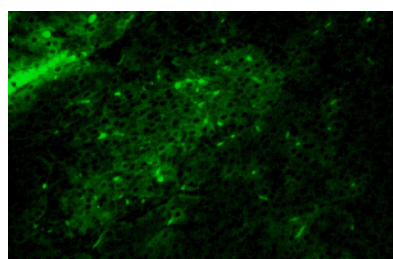

AATF

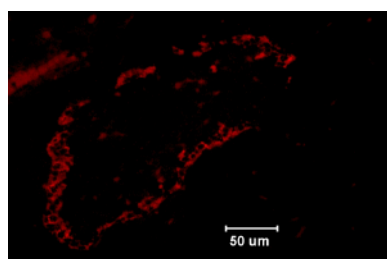

Glucagon

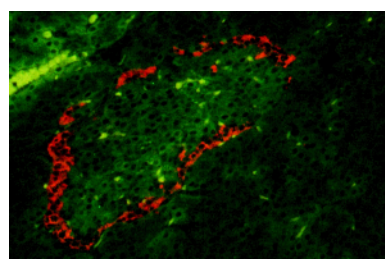

Merge

A

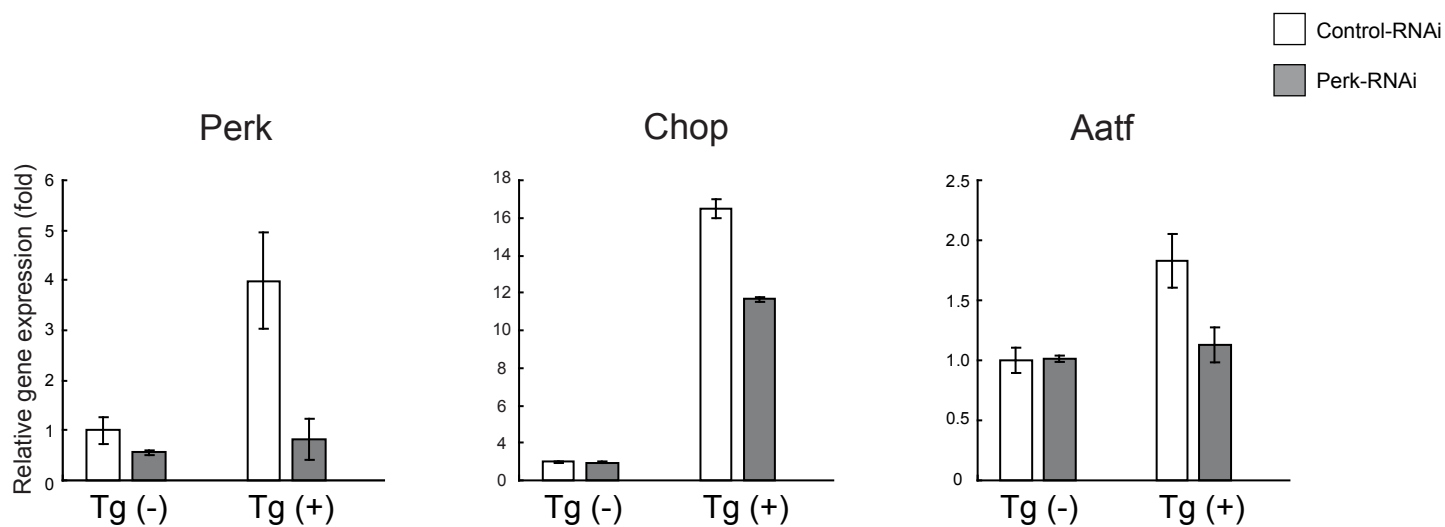

B

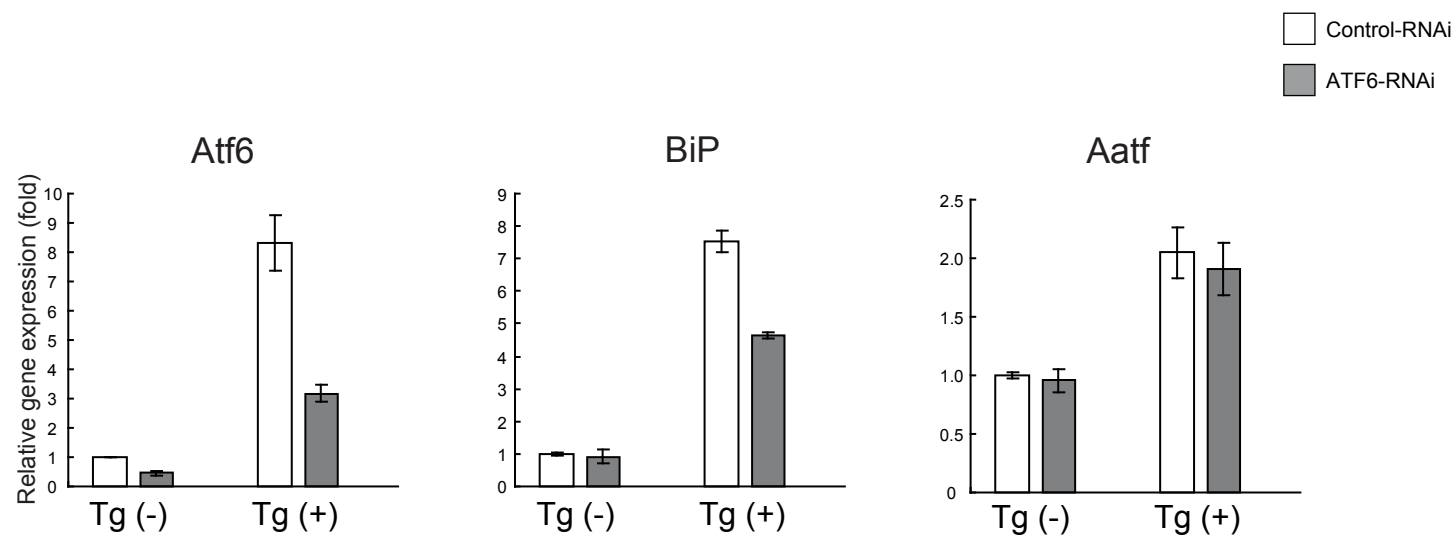

C

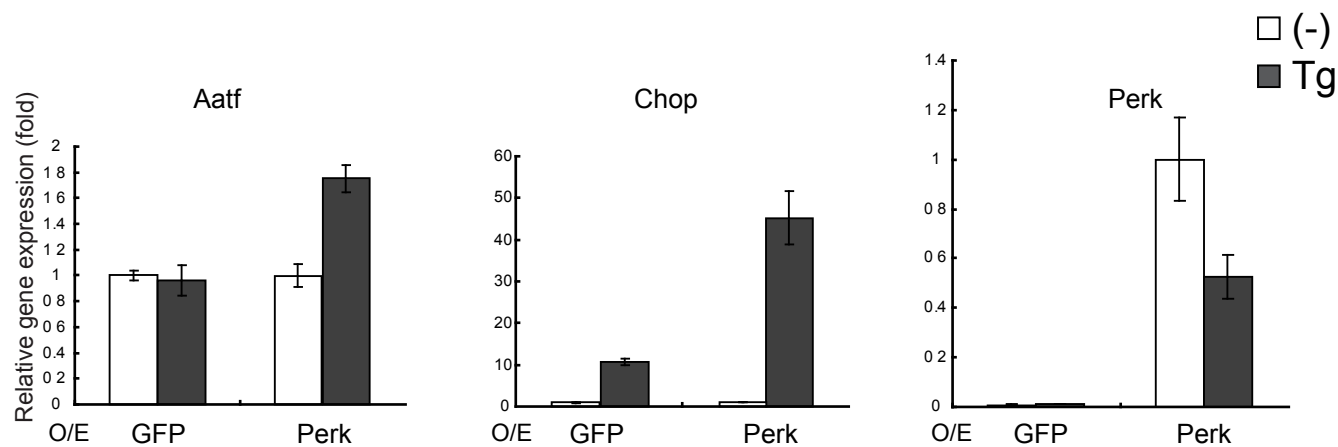

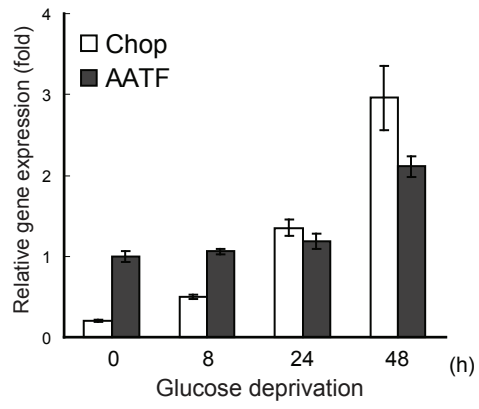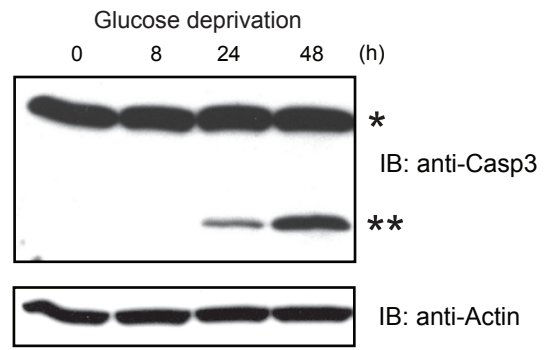

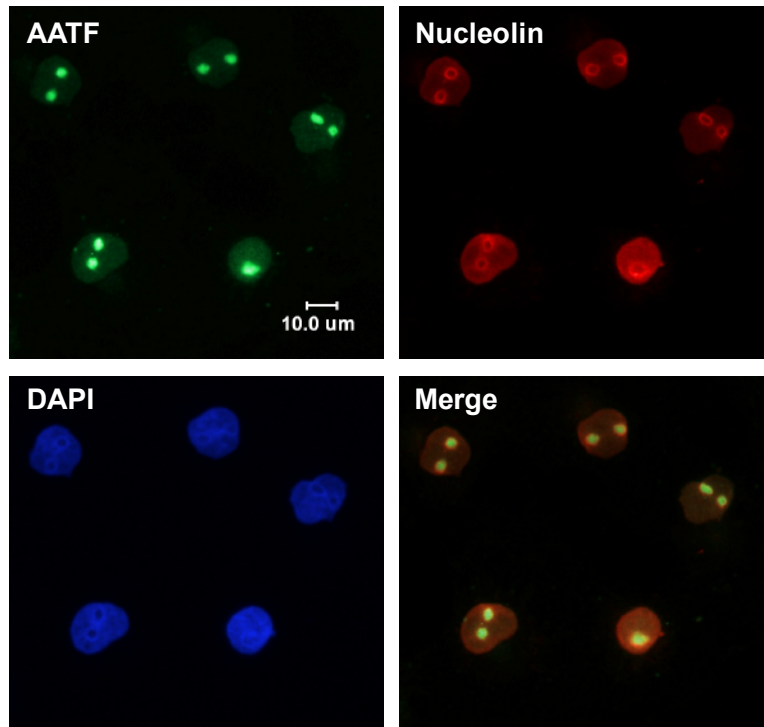

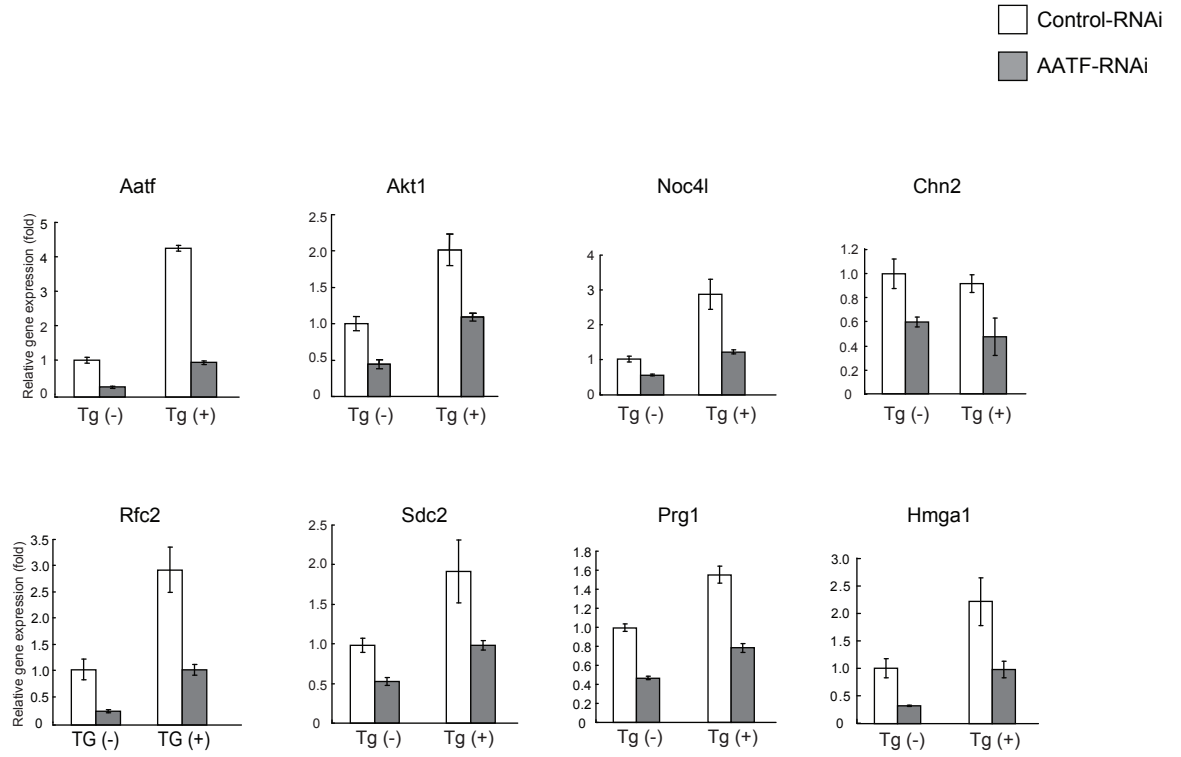

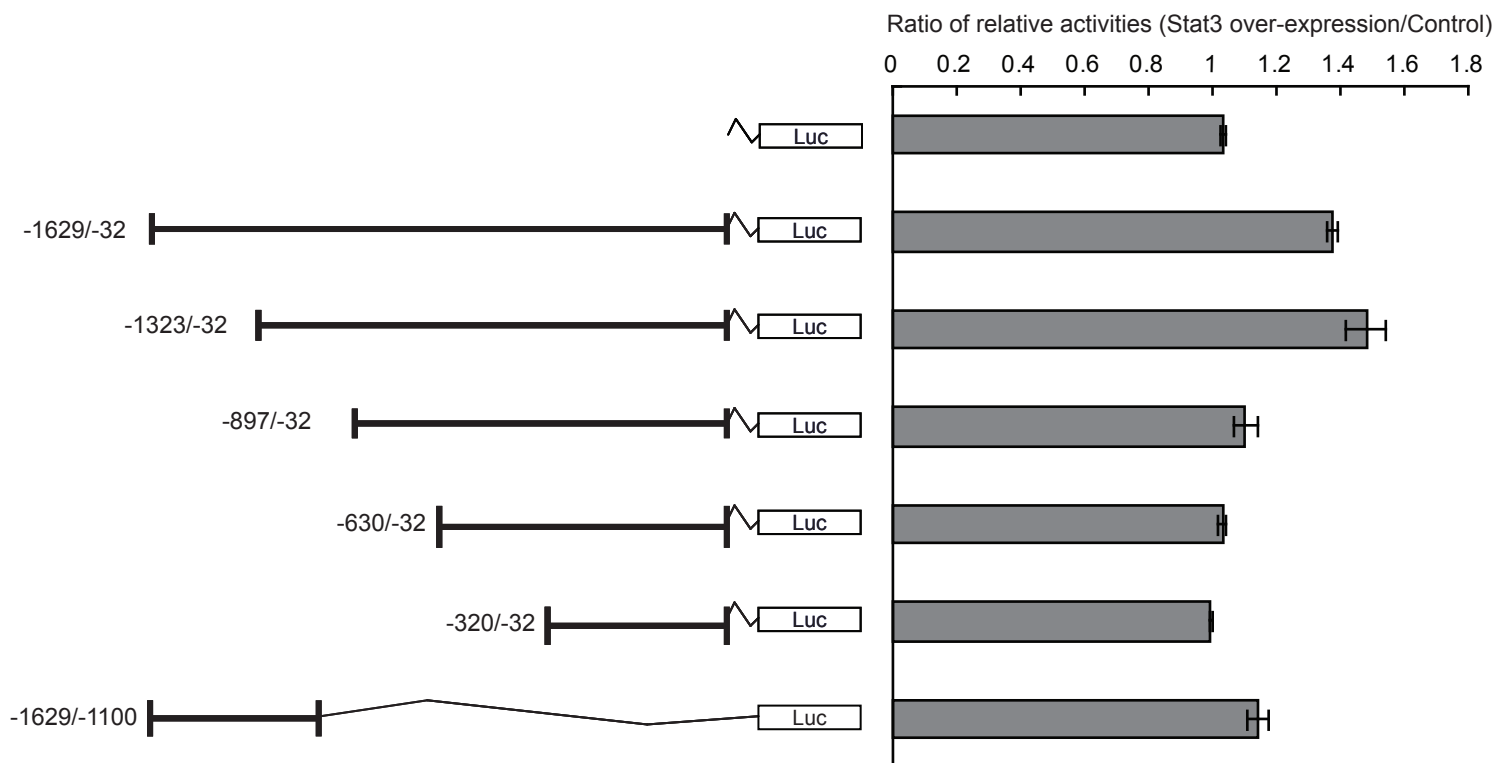





A

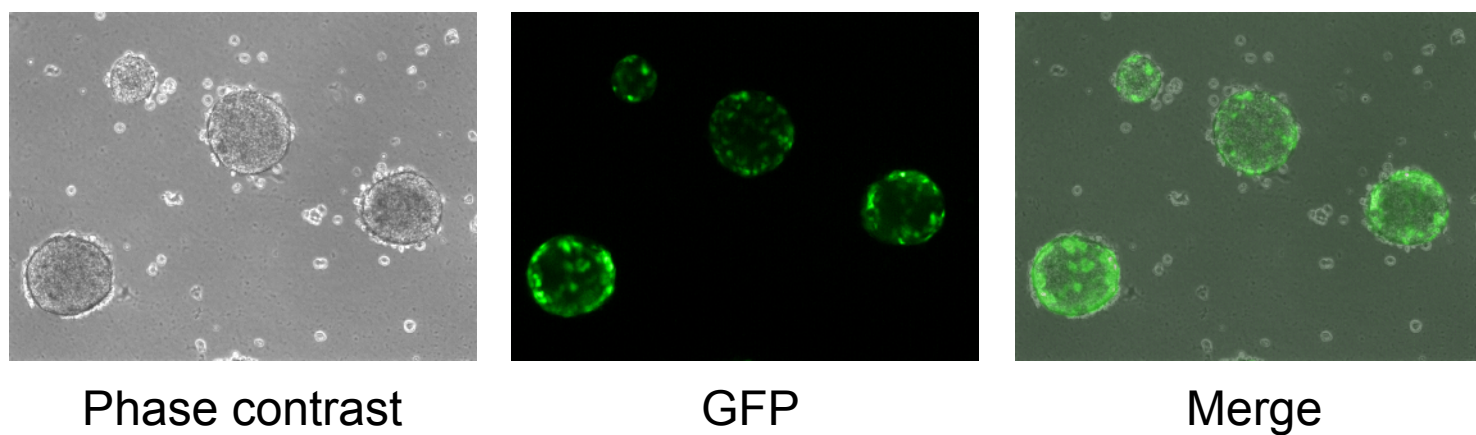

B

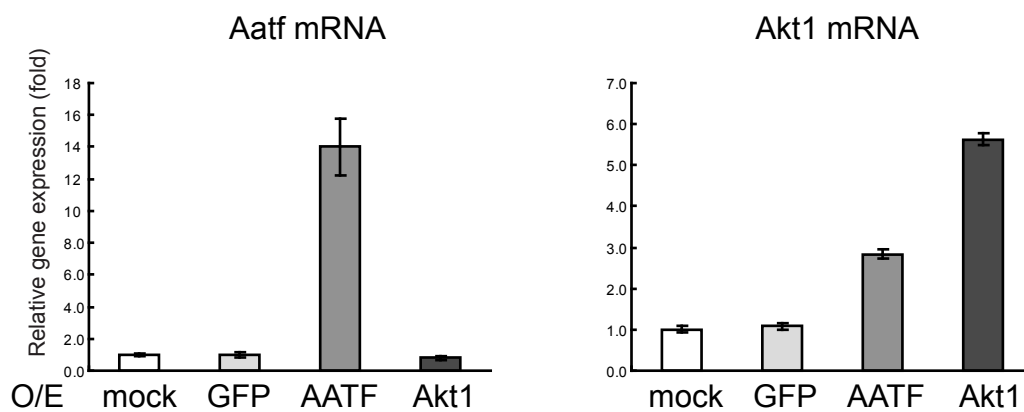

C

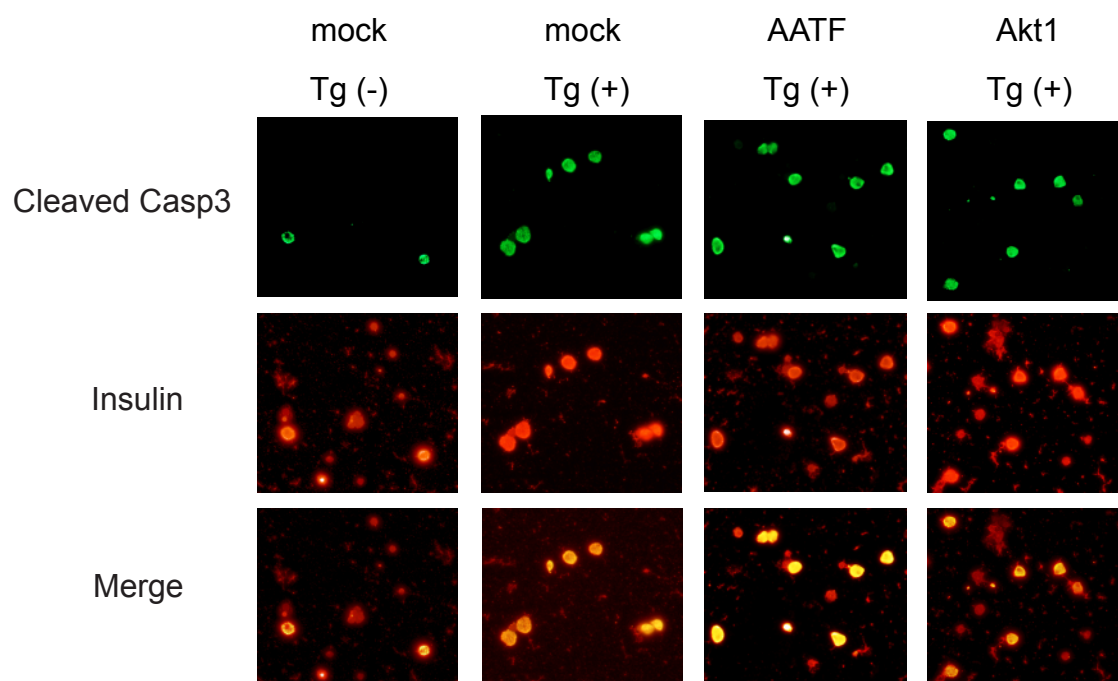

A

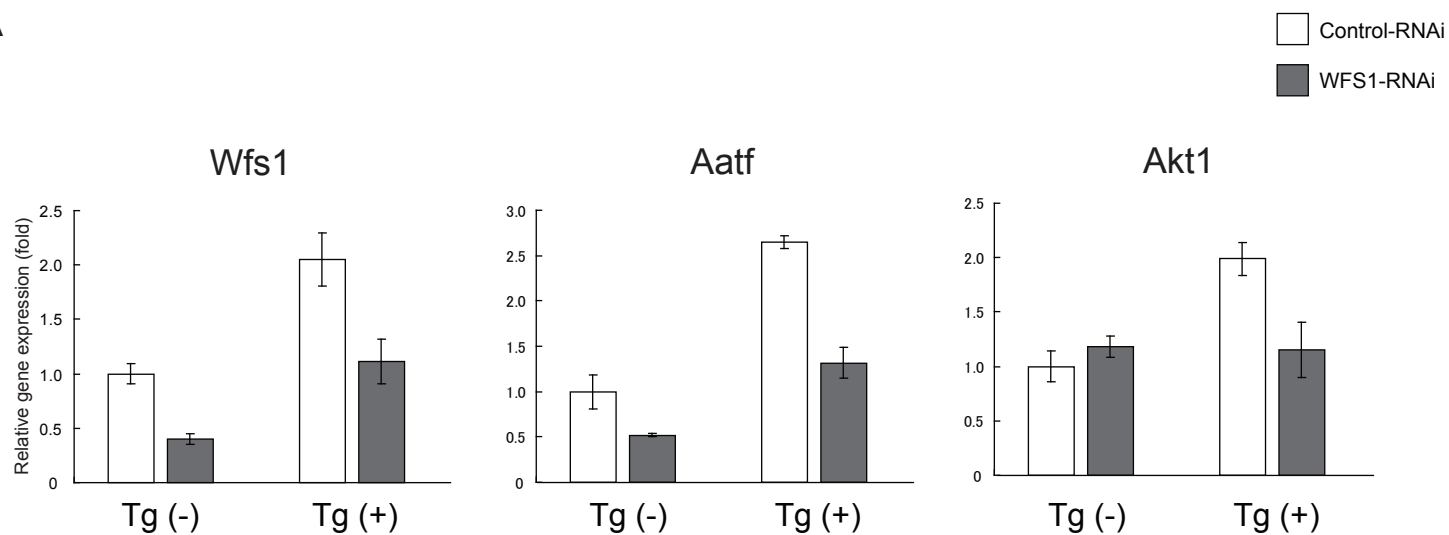

B

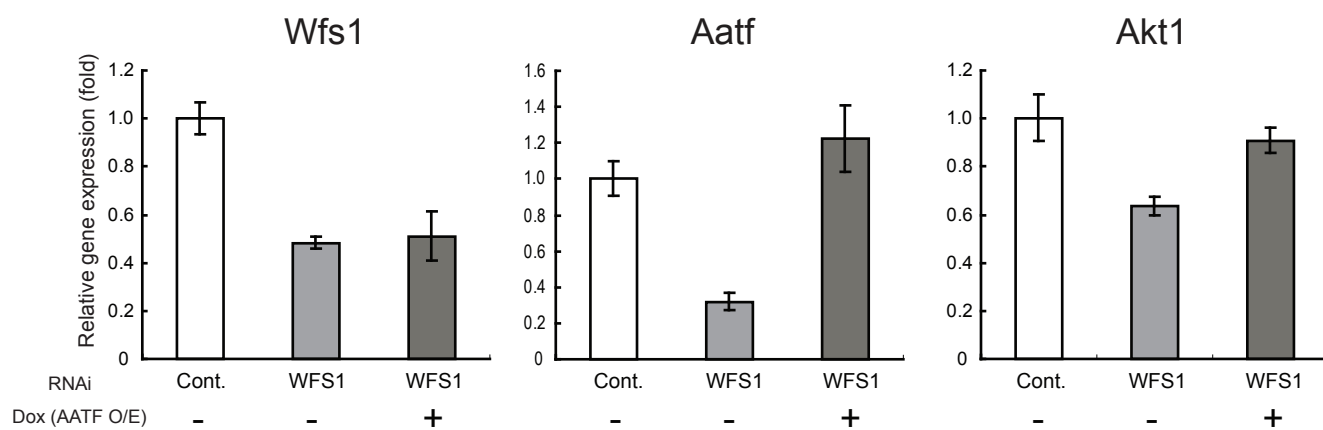

C

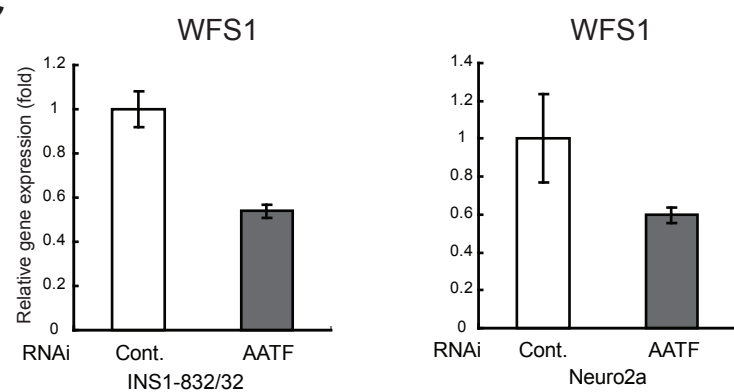

D

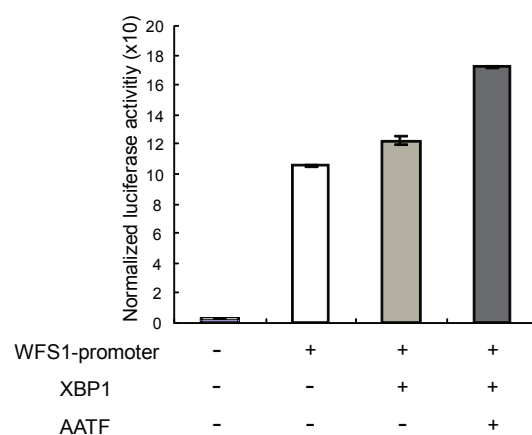

RNAi cont. AATF

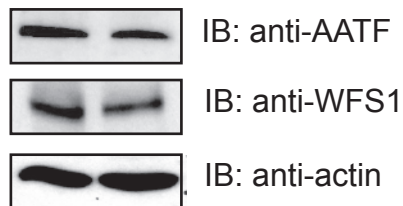

A

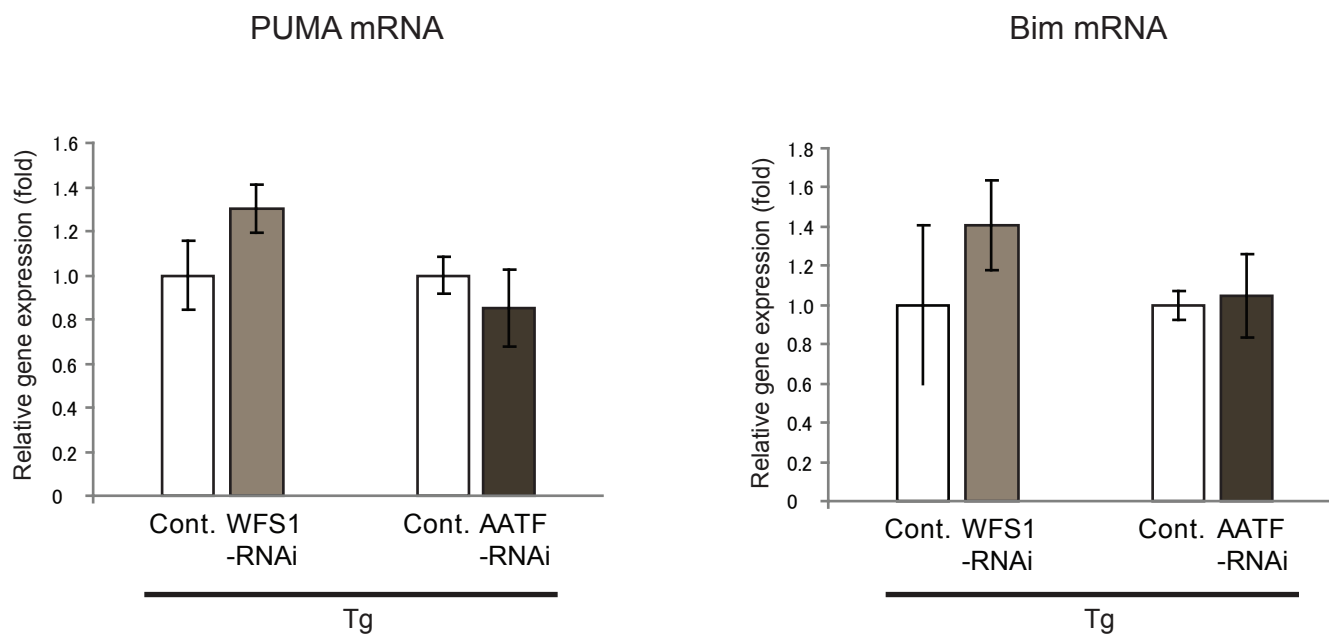

B

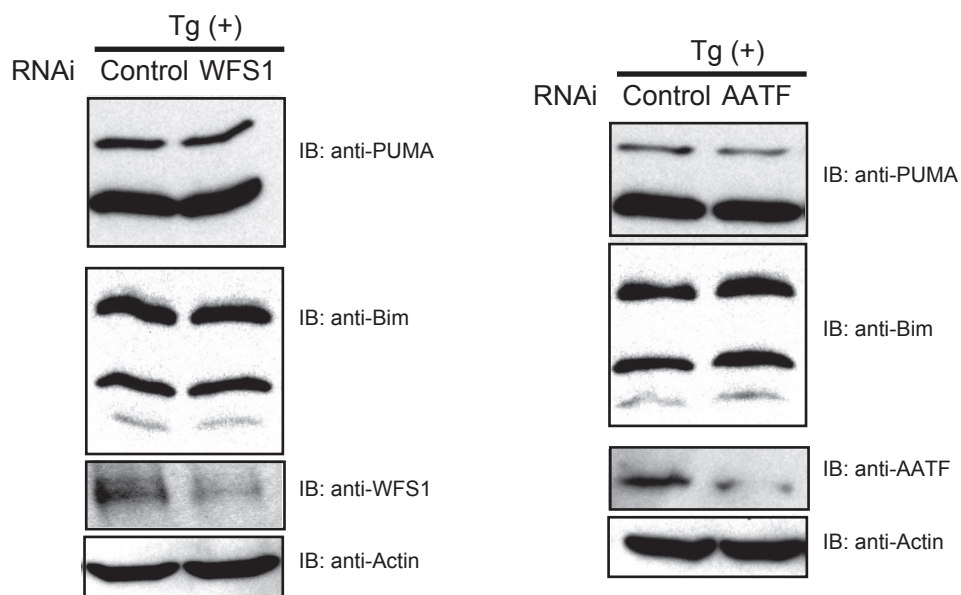

Supplement: NIHMS151338-supplement-1.pdf [file NIHMS151338-supplement-1.pdf]
